1 **TITLE:** Gut microbiome diversity is an independent predictor of survival in cervical cancer  
2 patients receiving chemoradiation

3

4 **Authors and Affiliations**

5 Travis T. Sims, MD, MPH<sup>1+</sup>, Molly B. El Alam, MPH<sup>2+</sup>, Tatiana V. Karpinets, PhD<sup>3</sup>, Stephanie  
6 Dorta-Estremera, PhD<sup>4</sup>, Venkatesh L. Hegde, PhD<sup>4</sup>, Sita Nookala, PhD<sup>4</sup>, Kyoko Yoshida-Court,  
7 PhD<sup>2</sup>, Xiaogang Wu, PhD<sup>3</sup>, Greyson W. G. Biegert, BS<sup>2</sup>, Andrea Y. Delgado Medrano, BS<sup>2</sup>,  
8 Travis Solley, BS<sup>2</sup>, Mustapha Ahmed-Kaddar, BS<sup>2</sup>, Bhavana V. Chapman, MD<sup>2</sup>, K. Jagannadha  
9 Sastry, PhD<sup>4</sup>, Melissa P. Mezzari, PhD<sup>5</sup>, Joseph F. Petrosino, PhD<sup>5</sup>, Lilie L. Lin, MD<sup>2</sup>, Lois  
10 Ramondetta, MD<sup>1</sup>, Anuja Jhingran, MD<sup>2</sup>, Kathleen M. Schmeler, MD<sup>1</sup>, Nadim J Ajami, PhD<sup>3</sup>,  
11 Jennifer Wargo, MD, MMSc<sup>6</sup>, Lauren E. Colbert, MD, MSCR<sup>2\*</sup>, Ann H. Klopp, MD, PhD<sup>2\*</sup>

12 <sup>1</sup>Department of Gynecologic Oncology and Reproductive Medicine, The University of Texas MD  
13 Anderson Cancer Center, Houston, TX, USA. <sup>2</sup>Department of Radiation Oncology, The University  
14 of Texas MD Anderson Cancer Center, Houston, TX, USA. <sup>3</sup>Department of Genomic Medicine,  
15 The University of Texas MD Anderson Cancer Center, Houston, TX, USA. <sup>4</sup>Department of  
16 Thoracic Head and Neck Medical Oncology, The University of Texas MD Anderson Cancer  
17 Center and the UTHealth Graduate School of Biomedical Sciences at Houston, Houston, TX,  
18 <sup>5</sup>Department of Molecular Virology and Microbiology, Alkek Center for Metagenomics and  
19 Microbiome Research, Baylor College of Medicine, Houston, TX, USA. <sup>6</sup>Department of Surgical  
20 Oncology, The University of Texas MD Anderson Cancer Center, Houston, TX, USA.

21 + Authors Contributed Equally

22 \* Shared corresponding authorship

23

24 **Correspondence:** L.E. Colbert or A.H. Klopp, Department of Radiation Oncology, Unit  
25 1422, The University of Texas MD Anderson Cancer Center, 1515 Holcombe  
26 Boulevard, Houston, TX 77030, USA. Telephone: 832-652-6033 (L.E.C.), 713-563-2444  
27 (A.H.K); fax: 713-745-2398; e-mail: [lcolbert@mdanderson.org](mailto:lcolbert@mdanderson.org),  
28 [aklopp@mdanderson.org](mailto:aklopp@mdanderson.org).

29

30

31

32

33

34

35

36

37

38

39

40

41

42

43

44

45

46

47 **ABSTRACT**

48 Diversity of the gut microbiome is associated with higher response rates for cancer patients  
49 receiving immunotherapy but has not been investigated in patients receiving radiation therapy.  
50 Additionally, current studies investigating the gut microbiome and outcomes in cancer patients  
51 may not adjusted for established risk factors. Here, we sought to determine if diversity and  
52 composition of the gut microbiome was independently associated with survival in cervical cancer  
53 patients receiving chemoradiation. Our study demonstrates that the diversity of gut microbiota is  
54 associated with a favorable response to chemoradiation. Additionally, compositional variation  
55 among patients correlated with short term and long-term survival. Short term survivor fecal  
56 samples were significantly enriched in *Porphyromonas*, *Porphyromonadaceae*, and *Dialister*,  
57 whereas long term survivor samples were significantly enriched in *Escherichia Shigella*,  
58 *Enterobacteriaceae*, and *Enterobacteriales*. Moreover, analysis of immune cells from cervical  
59 tumor brush samples by flow cytometry revealed that patients with a high microbiome diversity  
60 had increased tumor infiltration of CD4+ lymphocytes as well as activated subsets of CD4 cells  
61 expressing ki67+ and CD69+ over the course of radiation therapy. The modulation of gut  
62 microbiota before chemoradiation might provide an alternative way to enhance treatment efficacy  
63 and improve treatment outcomes in cervical cancer patients.

64 **Key words:** gynecologic cancer, cervical cancer, HPV-associated cancers, microbiome,  
65 chemoradiation

66

67

68

69

70 **MAIN**

71 Cervical cancer continues to be one of the leading causes of cancer-associated mortality globally<sup>1</sup>.  
72 More than 500,000 new cases of invasive cervical cancer will be diagnosed worldwide in 2020,  
73 resulting in over 300,000 deaths<sup>2</sup>. Multimodality therapy consisting of definitive chemoradiation  
74 (CRT) comprising external-beam radiotherapy (EBRT) followed by intracavitary brachytherapy  
75 with concurrent systemic chemotherapy continues to be the standard of care in clinical practice for  
76 locally advanced disease<sup>3</sup>.

77 The fecal or gut microbiome, a diverse community of bacteria, archaea, fungi, protozoa,  
78 and viruses, is thought to influence host immunity by modulating multiple immunologic pathways,  
79 thus impacting health and disease<sup>4-6</sup>. The diversity of the gut microbiome is defined as the number  
80 and relative abundance distribution of these distinct types of microorganisms colonizing within  
81 the gut<sup>7</sup>. Studies have suggested that dysbiosis of the gut microbiome confers a predisposition to  
82 certain malignancies and influences the body's response to a variety of cancer therapies, including  
83 chemotherapy, radiotherapy, and immunotherapy<sup>6,8-11</sup>. For example, melanoma patients are more  
84 likely to have a favorable response to immune checkpoint blockade and exhibit improved systemic  
85 and antitumor immunity if they have a more diverse intestinal microbiome<sup>11</sup>.

86 Radiotherapy promotes the activation of T cells directed against tumor antigens<sup>12-15</sup>. In  
87 combination with immunotherapy, radiotherapy can maximize the antitumor immune response and  
88 promote durable disease control<sup>16,17</sup>. We theorize that the gut microbiota may modulate  
89 radioresponse through immunologic mechanisms<sup>14,18</sup>. Studies investigating the gut microbiome  
90 and outcomes in cancer patients often do not adjust for confounding patient and tumor  
91 characteristics. To assess this, we sought to identify independent gut microbial risk factors in  
92 cervical cancer (CC) patients receiving chemoradiation (CRT) and to evaluate their impact on

93 survival. We hypothesize that gut microbial differences may affect clinical outcomes in patients  
94 with cervical cancer

95

## 96 **RESULTS**

### 97 *Patient Characteristics*

98 A total of 55 patients with a mean age of 47 years (range, 29-72 years) volunteered to  
99 participate in this study. The patients received standard treatment for cervical cancer with 5 weeks  
100 of EBRT and weekly cisplatin. After completion of EBRT, patients received brachytherapy. For  
101 evaluation of treatment response, patients underwent magnetic resonance imaging (MRI) at  
102 baseline and week 5 and positron emission tomography (PET)/computed tomography (CT) 3  
103 months after treatment completion (Fig. 1a). Most patients had stage IIB disease (51%) and  
104 squamous histology (78%). Their clinicopathologic data are summarized in Supplementary Table  
105 1. We staged cervical cancer using the 2014 International Federation of Gynecology and Obstetrics  
106 staging system. The median cervical tumor size according to MRI was 5.4 cm (range, 1.2-11.5  
107 cm). Thirty patients (55%) had lymph node involvement according to imaging studies. We first  
108 analyzed the bacterial 16S rDNA (16Sv4) fecal microbiota at baseline with respect to disease  
109 histology, grade, and stage. We found that the baseline  $\alpha$ -diversity (within tumor samples) and  $\beta$ -  
110 diversity (between samples) of the fecal microbiome in the cervical cancer patients did not differ  
111 according to histology, grade, or stage ( $P > 0.05$ ) (Supplementary Fig. 1a-d).

### 112 *Univariate and multivariate analysis of factors affecting recurrence free survival (RFS) and* 113 *overall survival (OS)*

114 In the univariate Cox proportional hazard regression model predicting RFS, 3 covariates  
115 showed  $P \leq 0.2$ . As shown in Table 1, univariate analysis identified older age (Hazard Ratio (HR)

116 of 0.93 (95% CI = 0.87-0.98, P = 0.0096)), Shannon diversity index (SDI) (HR of 0.51 (95% CI =  
117 0.23-1.1, P = 0.087)) and body mass index (BMI) (HR of 0.92 (95% CI = 0.84-1, P = 0.096)) as  
118 risk factors for RFS. Multivariate survival analyses identified BMI and SDI as independent  
119 prognostic factors for RFS with a HR of 0.87 (95% CI = 0.77-0.98, P = 0.02) and 0.36 (95% CI =  
120 0.15-0.84, P = 0.018) respectively. As shown in Table 2, univariate analysis identified SDI (HR of  
121 0.34 (95% CI = 0.1-1.1, P = 0.08) and BMI (HR of 0.83 (95% CI = 0.69-1, P = 0.055)) as risk  
122 factors for OS. For OS, multivariate survival analyses again identified BMI and SDI as  
123 independent prognostic factors with a HR of 0.78 (95% CI = 0.623-0.97, P = 0.025) and 0.19 (95%  
124 CI = 0.043-0.83, P = 0.028) respectively.

### 125 ***Baseline Gut Microbiota Diversity is Associated with Favorable Responses***

126 During the median follow-up period of 24.5 months, 7 patients died; all patients (12.7% of  
127 the total study population) died of disease (DOD). Figure 1 shows the Kaplan-Meier curves for  
128 RFS and OS. Given our univariate and multivariate analyses performed by Cox proportional  
129 hazard model identified SDI as an independent predictor for RFS and OS, we first tested the  
130 relationship between gut diversity and RFS and OS in our cohort by stratifying patients based on  
131 high and low SDI. We stratified the patients by SDI as high-diversity versus low-diversity groups  
132 based on the cutoff value of SDI (2.69) calculated by receiver operating characteristic curve  
133 (ROC). We demonstrate that patients with high fecal alpha diversity at baseline showed a trend  
134 toward prolonged RFS and OS when compared to those with low diversity (P = 0.16 and 0.094,  
135 respectively) (Fig. 1a,b). Next, because our univariate and multivariate analyses performed by Cox  
136 proportional hazard model also identified BMI as an independent predictor for RFS and OS, we  
137 tested the relationship between diversity and RFS and OS in our cohort by stratifying patients  
138 based on high and low Shannon diversity metric and normal or high BMI. As shown in Figure

139 1d,e, when BMI and gut diversity are stratified for at baseline, patients with normal BMI and  
140 higher SDI had a longer median RFS duration ( $P = 0.0027$ ) (Fig. 1d). OS (Fig. 1e) was longer for  
141 patients with normal BMI and higher gut diversity ( $P = 0.2$ ).

### 142 ***Compositional Difference in Gut Microbiome in Response to chemoradiation***

143 To further investigate whether the composition of gut microbiome was associated with  
144 response to CRT, we used Linear discriminant analysis (LDA) Effect Size analysis to identify  
145 bacterial genera that were differentially enriched in short term and long term cervical cancer  
146 patients ( $P < 0.05$ ; LDA score  $> 3.5$ ). In all patients, multiple taxa differed significantly at baseline  
147 between short and long term survivors. Specifically, short term survivor fecal samples were  
148 significantly enriched in *porphyromonas*, *porphyromonadaceae*, and *dialister*, whereas long term  
149 survivor samples were significantly enriched in *Escherichia Shigella*, *Enterobacteriaceae*, and  
150 *Enterobacteriales* ( $P < 0.05$ ; LDA score  $> 3.5$ , Fig. 2a,b). Our univariate analyses performed by  
151 Cox proportional hazard model identified *Pasteurellales*, *Haemophilus* and *Veillonella* as  
152 independent predictors for RFS and OS. We tested the relationship between these taxa and RFS  
153 and OS in our cohort by stratifying patients based on their relative abundance at baseline  
154 (Supplemental Fig. 2). We demonstrate that patients with high relative abundance of *Veillonella*  
155 at baseline showed a trend toward prolonged RFS and OS when compared to those with a low  
156 relative abundance at baseline ( $P = 0.08$  and  $P = 0.054$ , respectively).

### 157 ***Association between Gut Microbiota Profile and Immune Signatures***

158 Because the gut microbiota is thought to influence disease progression partially through  
159 modulating local immune response, we analyzed the cervical tumors in our cohort of patients via  
160 flow cytometry on tumor brushings performed before week 1, week 3 and week 5 of radiation  
161 therapy. To identify features associated with high gut diversity, Spearman correlation analysis was

162 conducted between immune signatures at each time point. High SDI was positively correlated with  
163 tumor infiltration of CD4 T cells at week 3, and CD4ki67+ T-cells at week 5, (Table 3 and Fig.  
164 3a-d). These results suggest that patients with high gut diversity develop increased infiltration of  
165 activated CD4+ T-cell subsets.

166

## 167 **DISCUSSION**

168 The aim of this study was to identify independent gut microbial risk factors in cervical cancer  
169 patients receiving chemoradiation and to evaluate their impact on survival. We found BMI and gut  
170 diversity to be independent risk factors for RFS and OS in cervical cancer patients undergoing  
171 chemoradiation. Higher alpha gut diversity at baseline correlated with an improved RFS and OS.  
172 Our results indicate that overweight or obesity is a favorable prognostic factor independent of gut  
173 diversity. Additionally, our results demonstrate that patients with better clinical survival exhibit  
174 higher diversity as well as a distinct gut microbiome composition. Lastly, the association between  
175 gut diversity and local immune signatures highlights helper CD4+ T cells as potential mediators  
176 of antitumor immunity upon CRT treatment. Taken together, our results imply that the diversity  
177 of gut microbiota might be a shared benefit factor in those who respond well to CRT treatment.

178 It is now generally accepted that the gut microbiome modulates immune responses,  
179 antitumor immunity, and clinical outcomes in a variety of malignancies<sup>9,11,19</sup>. The gut microbiome  
180 is thought to affect both innate and adaptive immune responses. Specifically how the gut  
181 microbiome exerts its influence continues to be explored, but this explanation may have important  
182 implications if specific taxa are found to change host response to treatment via  
183 immunomodulation<sup>6</sup>. In our study, T helper cell profiles at baseline correlate with gut diversity.  
184 These results confer that T cells and response to CRT are likely affected by the gut microbiota



185 independent of other factors such as BMI. Using multi-color flow cytometry we performed  
186 correlation analysis on individual immune signatures and microbiome diversity. The frequency of  
187 helper CD4<sup>+</sup> T cells were chiefly identified. Cervical cancer is considered to be an immunogenic  
188 tumor because its origin is dependent on a persistent infection with human papillomavirus (HPV),  
189 most often HPV16 or HPV18<sup>20</sup>. Previous studies have reported that the number and functional  
190 orientation of tumor-infiltrating CD4<sup>+</sup> and CD8<sup>+</sup> T cells and the presence of M1 type macrophages  
191 strongly correlates with survival in patients with cervical cancer after chemoradiation<sup>20,21</sup>. T cells  
192 are capable of rapid antigen-specific responses and play critical roles in immune recall responses.  
193 In addition to the percentage of CD4<sup>+</sup> T cell subsets, the increase in CD4 Ki67, CD4 CD69, and  
194 CD4 PD1 in patients with high microbiota diversity implies that the gut microbiome also  
195 modulates the proliferation of certain immune cell populations. Recent studies have already  
196 reported that chemoradiotherapy for cervical cancer induces unfavorable immune changes  
197 reflected by a decreased number of circulating lymphocytes, both CD4<sup>+</sup> and CD8<sup>+</sup> T cells, and an  
198 increased percentage in myeloid-cell populations, including myeloid-derived suppressor cells and  
199 monocytes<sup>20</sup>. Our study suggest that CD4<sup>+</sup> T cells infiltrating the tumor microenvironment support  
200 and encourage the activity of other immune cells by releasing T cell cytokines.

201 We found gut diversity to be associated with a favorable response to CRT against cervical  
202 cancer. Considering the correlation between gut diversity and local helper T cells being reshaped  
203 upon CRT treatment, we propose that patients harboring a more diverse gut microbiota at baseline  
204 may benefit from CRT to a greater extent. This might be mediated by the reprogramming of local  
205 antitumor immune responses. The significance of our study lies in that the modulation of gut  
206 microbiota before treatment might provide an alternative way to enhance the efficacy of CRT,  
207 specifically in advanced staged disease in which systemic failure of current therapies represents a

208 major challenge. Our results suggest that changes in the gut microenvironment contribute  
209 substantially to treatment success or failure, particularly in so-called immunogenic tumors like  
210 cervical cancer.

211 Our own group has previously characterized the gut microbiome of cervical cancer patients  
212 compared to healthy female controls, and have reported on differences in the relative abundance  
213 of specific taxa<sup>22</sup>. Our new findings support the hypothesis that organisms inhabiting the gut  
214 microbiome may be manipulated to improve cancer treatment response. Knowing specific gut  
215 microbial organisms that inhabit and undergo changes in patients with cervical cancer during CRT  
216 provides further insight into mechanisms that may modulate immune response and potentiate  
217 treatment outcomes in cancer patients. Researchers have already studied the treatment-enhancing  
218 utility of the gut microbiota in multiple areas of medicine<sup>10,23</sup>. Additionally, there is emerging data  
219 describing the influence of the gut microbiome as it pertains to radiotherapy<sup>24</sup>. Given that radiation  
220 can change the composition of the gut microbiome by altering the relative abundance of different  
221 taxa, we have to postulate whether radioresistant taxa ultimately alter the effectiveness of  
222 radiotherapy for cervical cancer<sup>6,25,26</sup>. The results of our study illustrate the potential of  
223 intentionally modifying the gut microbiota to accumulate CRT-tolerant species as an interventional  
224 strategy to enhance response of cervical cancer to CRT. Furthermore, determining whether  
225 changes in the human gut microbiome during CRT affect patients' risk of treatment-related toxic  
226 effects may be an area that deserves further investigation.

227 The “obesity paradox”, which suggest a positive association between increasing BMI as it  
228 pertains to a specific disease, was firstly reported in heart failure<sup>27</sup>, but has since been described  
229 in a variety of disease processes, including other gynecologic cancers<sup>28–30</sup>. Theories centered  
230 around the “obesity paradox” suggest that patients with a high BMI may be better able to withstand

231 cancer-induced consumption and stress compared with patients with a low BMI<sup>31</sup>. In uterine cancer  
232 it has been reported that the risk of recurrence differed significantly by BMI<sup>32</sup>. Specifically, a  
233 greater proportion of obese women met criteria for having a low risk of recurrence, while thin  
234 women tended to have a high-intermediate risk or recurrence. Many studies have investigated the  
235 impact of BMI on cervical cancer, but the association between weight and cervical cancer remains  
236 ambiguous<sup>33</sup>. HPV is considered to be responsible for 99.7% of all cervical cancers<sup>34</sup>, however, it  
237 has been suggested that obesity may further increase this risk<sup>35–37</sup>. Other reports however do not  
238 report an association<sup>38,39</sup>. For example, a review by Lane *et al.* finally refuted the relationship  
239 between cervical cancer and obesity ultimately citing a lack of evidence<sup>40</sup>. The inconsistent  
240 conclusions among studies investigating the association between BMI and cervical cancer may be  
241 attributed to numerous factors including patient selection criteria, sample size and generalizability  
242 of the study population. Among these factors, patient selection criteria may be especially  
243 important, because tumor histology seems to be closely associated with BMI<sup>37</sup>.

244         The strengths of this study include the use of careful clinical staging, histopathology, and  
245 reliable phylogenetic and statistical analysis to assess bacterial community compositional changes  
246 using both microbial divergence and taxon-based methods. Additionally, we followed a complete  
247 protocol for 16S analysis ranging from the sample collection method, DNA extraction, and  
248 microbiome sequencing, thus limiting artifactual variations. Although this study has yielded  
249 intriguing findings, an important limitation is the small sample size. Consequently, the sample size  
250 limited our ability to weigh statistical power. Yet despite the relatively small size of this  
251 prospective study, large statistically significant differences were still observed, and we believe the  
252 results presented herein provide solid evidence elucidating the role of the gut microbiome as it  
253 pertains to the treatment of cervical cancer . We hope the integration of these data will produce

254 actionable strategies geared toward targeting and manipulating the microbiome in order to  
255 ultimately improve cervical cancer therapy.

256 In conclusion, our study demonstrates that the diversity of gut microbiota is associated with  
257 a favorable response to chemoradiation. Additionally, compositional variation among patients  
258 correlated with short term and long-term survival. Our study demonstrates that gut diversity is a  
259 significant factor for predicting OS in CC patients undergoing CRT when BMI is accounted for,  
260 and may help explain the “obesity paradox” in cancer response. Moreover, analysis of immune  
261 cells from cervical tumor brush samples by flow cytometry revealed that an association between  
262 high microbial diversity, increased tumor infiltration of CD4+ lymphocytes and the activation of  
263 CD4 cells over the course of radiation therapy. The correlation between gut diversity and increased  
264 tumor infiltration of CD4+ lymphocytes suggest that patients harboring a more diverse gut  
265 microbiota at baseline may benefit from CRT to a greater extent. The significance of our study lies  
266 in that modulation of gut microbiota before chemoradiation might provide an alternative way to  
267 enhance treatment efficacy and improve treatment outcomes in cervical cancer patients. Additional  
268 studies exploring the relationship between gut diversity, chemoradiation, and treatment efficacy  
269 are needed to further understand the role of the gut microbiome in cervical cancer treatment.

270

## 271 **METHODS**

272 **Participants and clinical data.** Gut microbiome and cervical swab samples were collected  
273 prospectively from cervical cancer patients according to a protocol approved by The University of  
274 Texas MD Anderson Cancer Center Institutional Review Board (MDACC 2014-0543) for patients  
275 with biopsy-proven carcinoma of the cervix treated at MD Anderson and the Lyndon B. Johnson  
276 Hospital Oncology Clinic from September 22, 2015, to January 11, 2019. All patients had new

277 diagnoses of locally advanced, nonmetastatic carcinoma of the cervix and underwent definitive  
278 CRT with EBRT followed by brachytherapy. Patients received a minimum of 45 Gy via EBRT in  
279 25 fractions over 5 weeks with weekly cisplatin followed by two brachytherapy sessions at  
280 approximately weeks 5 and 7 with EBRT in between for gross nodal disease or persistent disease  
281 in the parametrium. Patients with stage IB1 cancer were given CRT due to the presence of nodal  
282 disease. Clinical variables, demographics, and pathologic reports were abstracted from electronic  
283 medical records.

284  
285 **Sample collection and DNA extraction.** Stool was collected from all patients by a clinician  
286 performing rectal exams at five time points (baseline; weeks 1, 3, and 5 of radiotherapy; and 3  
287 months after CRT completion) using a matrix-designed quick-release Isohelix swab to characterize  
288 the diversity and composition of the microbiome over time. The swabs were stored in 20 µl of  
289 protease K and 400 µl of lysis buffer (Isohelix) and kept at -80°C within 1 h of sample collection.

290  
291 **16S rRNA gene sequencing and sequence data processing.** 16S rRNA sequencing was  
292 performed for fecal samples obtained from all patients at four time points to characterize the  
293 diversity and composition of the microbiome over time. 16S rRNA gene sequencing was done at  
294 the Alkek Center for Metagenomics and Microbiome Research at Baylor College of Medicine.  
295 16S rRNA was sequenced using approaches adapted from those used for the Human Microbiome  
296 Project<sup>41</sup>. The 16S rDNA V4 region was amplified via polymerase chain reaction with primers that  
297 contained sequencing adapters and single-end barcodes, allowing for pooling and direct  
298 sequencing of polymerase chain reaction products. Amplicons were sequenced on the MiSeq  
299 platform (Illumina) using the 2 x 250-bp paired-end protocol, yielding paired-end reads that

300 overlapped nearly completely. Sequence reads were demultiplexed, quality-filtered, and  
301 subsequently merged using the USEARCH sequence analysis tool (version 7.0.1090) (4). 16S  
302 rRNA gene sequences were bundled into operational taxonomic units at a similarity cutoff value  
303 of 97% using the UPARSE algorithm<sup>42</sup>. To generate taxonomies, operational taxonomic units were  
304 mapped to an enhanced version of the SILVA rRNA database containing the 16Sv4 region. A  
305 custom script was used to create an operational taxonomic unit table from the output files generated  
306 as described above for downstream analyses of  $\alpha$ -diversity,  $\beta$ -diversity, and phylogenetic trends.  
307 Principal coordinates analysis was performed by institution and sample set to make certain no  
308 batch effects were present.

309  
310 **Flow Cytometry.** Immunostaining was performed according to standard protocols<sup>43</sup>. Cells were  
311 fixed using the Foxp3/Transcription Factor Staining Buffer Set (eBioscience, Waltham, MA) and  
312 stained with a 16 color panel with antibodies from Biolegend (San Diego, CA), BD Bioscience  
313 (San Jose, CA), eBioscience (Waltham, MA), and Life Technologies (Carlsbad, CA). Analysis  
314 was performed on a 5-laser, 18 color LSRFortessa X-20 Flow Cytometer (BD Biosciences, San  
315 Jose, CA). Analysis was performed using FlowJo version 10 (Flowjo LLC, Ashland, OR). We  
316 then followed a similar previously published method<sup>43</sup>. Briefly, the cells were incubated with the  
317 antibodies for surface markers at 4°C in dark for 30 minutes. They were then washed twice with  
318 FACS buffer and fixed and permeabilized with FOXP3 Fix/perm Kit (ThermoFisher Scientific,  
319 Waltham, MA). Next, intracellular staining was performed by preparing the antibodies in  
320 permeabilization buffer and incubating the cells for 30 minutes at 4°C in the dark. Cells were  
321 washed with FACS buffer twice and prepared for acquisition on an LSR Fortessa X-20 analyzer  
322 at the Flow Cytometry Core at MD Anderson Cancer Center and were analyzed using FlowJo

323 software (FlowJo, LLC, Ashland, OR). Compensation controls were prepared using OneComp  
324 ebeads (eBioscience, Waltham, MA) and fluorescence minus one controls were used<sup>43</sup>.

325  
326 **Statistical analyses.** For microbiome analysis, rarefaction depth was set at 7066 reads. The  
327 Shannon diversity index (SDI) was used to evaluate  $\alpha$ -diversity (within samples), and principle  
328 coordinates analysis of unweighted UniFrac distances was used to examine  $\beta$ -diversity (between  
329 samples). Patient and tumor characteristics were analyzed by univariate and multivariate Cox  
330 regression models for Recurrence-free survival (RFS) and Overall survival (OS) based on  
331 univariate  $p$ -value  $< 0.1$ . Characteristics included age, body mass index (BMI), race, FIGO stage,  
332 grade, histology, nodal status, smoking status, antibiotic use and max tumor size. For each outcome  
333 of interest, a multivariate Cox regression analysis was performed to adjust for the effects of  
334 prognostic factors identified on univariate analysis as influencing survival in cervical cancer.  
335 These analyses were conducted using covariates with  $p \leq 0.1$  in a stepwise fashion. We also ran a  
336 correlation analysis of alpha diversity metrics with tumor flow cytometry markers using a linear  
337 regression and Spearman's correlation. Alpha (within sample) diversity was evaluated using SDI.  
338 The relative abundance of microbial taxa, classes, and genera present in long term vs short term  
339 survivors was determined using LDA Effect Size<sup>44</sup>, applying the one-against-all strategy with a  
340 threshold of 3.5 for the logarithmic LDA score for discriminative features and  $\alpha$  of 0.05 for  
341 factorial Kruskal-Wallis testing among classes. Long term survivors were classified as patients  
342 who had a follow up of two years or more and were alive at time of last follow up, while short  
343 term survivors had a follow up of one year or less. LDA Effect Size analysis was restricted to  
344 bacteria present in 20% or more of the study population. Kaplan-Meier curves were generated for  
345 patients with normal BMI and overweight/obese BMI based on Cox analysis and clostridia

346 abundance. The significance of differences was determined using the log-rank test. Statistical  
347 significance was set at an alpha of 5% for a two-sided p-value. Analyses were conducted using  
348 Rstudio version Orange Blossom – 1.2.5033.

349

## 350 **ACKNOWLEDGEMENTS**

351 This research was supported in part by the Radiological Society of North America Resident/Fellow  
352 Award (to L.E.C.), the National Institutes of Health (NIH) through MD Anderson’s Cancer Center  
353 Support Grant P30CA016672, the Emerson Collective and the National Institutes of Health T32  
354 grant #5T32 CA101642-14 (T.T.S). This study was partially funded by The University of Texas  
355 MD Anderson Cancer Center HPV-related Cancers Moonshot (L.E.C and A.K.). The human  
356 subjects who participated in this study are gratefully acknowledged.

## 357 **AUTHOR CONTRIBUTION**

358 All authors were involved in subject identification, data collection, interpretation of the statistical  
359 analysis, and review and approval of the final manuscript. The study concept was conceived by  
360 L.E.C., A.K., M.B.E.A, and T.T.S. The manuscript was written by T.T.S.

## 361 **COMPETING INTERESTS**

362 The authors report no conflicts of interest, financial or otherwise, related to the subject of this  
363 article.

## 364 **ROLE OF FUNDING SOURCES**

365 The funding sources were not involved in the research hypothesis development, study design,  
366 data analysis, or manuscript writing. Data access was limited to the authors of this manuscript.



367 The investigation described in this manuscript was presented in-part by Dr. Travis T. Sims  
368 during the American Society Of Clinical Oncology (ASCO) 2020 Annual Meeting, May 29-June  
369 2, 2020.

370

371

372

373

374

375

376

377

378

379

380

381

382

383

384

385

386

387

388

389

390 **REFERENCES**

- 391 1. Islami F, Fedewa SA, Jemal A. Trends in cervical cancer incidence rates by age,  
392 race/ethnicity, histological subtype, and stage at diagnosis in the United States. *Prev Med.*  
393 2019;123:316-323. doi:10.1016/j.ypmed.2019.04.010
- 394 2. Siegel RL, Miller KD, Jemal A. Cancer statistics, 2019. *CA Cancer J Clin.* 2019;69(1):7-34.  
395 doi:10.3322/caac.21551
- 396 3. Monk BJ, Tewari KS, Koh W-J. Multimodality Therapy for Locally Advanced Cervical  
397 Carcinoma: State of the Art and Future Directions. *J Clin Oncol.* 2007;25(20):2952-2965.  
398 doi:10.1200/JCO.2007.10.8324
- 399 4. The Human Microbiome Project Consortium. Structure, function and diversity of the healthy  
400 human microbiome. *Nature.* 2012;486(7402):207-214. doi:10.1038/nature11234
- 401 5. Cho JA, Chinnapen DJF. Targeting friend and foe: Emerging therapeutics in the age of gut  
402 microbiome and disease. *J Microbiol.* 2018;56(3):183-188. doi:10.1007/s12275-018-8037-z
- 403 6. Helmink BA, Khan MAW, Hermann A, Gopalakrishnan V, Wargo JA. The microbiome,  
404 cancer, and cancer therapy. *Nat Med.* 2019;25(3):377-388. doi:10.1038/s41591-019-0377-7
- 405 7. Jin Y, Dong H, Xia L, et al. The Diversity of Gut Microbiome is Associated With Favorable  
406 Responses to Anti-Programmed Death 1 Immunotherapy in Chinese Patients With NSCLC. *J*  
407 *Thorac Oncol Off Publ Int Assoc Study Lung Cancer.* 2019;14(8):1378-1389.  
408 doi:10.1016/j.jtho.2019.04.007
- 409 8. Cerf-Bensussan N, Gaboriau-Routhiau V. The immune system and the gut microbiota:  
410 friends or foes? *Nat Rev Immunol.* 2010;10(10):735-744. doi:10.1038/nri2850

- 411 9. McQuade JL, Daniel CR, Helmink BA, Wargo JA. Modulating the microbiome to improve  
412 therapeutic response in cancer. *Lancet Oncol.* 2019;20(2):e77-e91. doi:10.1016/S1470-  
413 2045(18)30952-5
- 414 10. Roy S, Trinchieri G. Microbiota: a key orchestrator of cancer therapy. *Nat Rev Cancer.*  
415 2017;17(5):271-285. doi:10.1038/nrc.2017.13
- 416 11. Gopalakrishnan V, Spencer CN, Nezi L, et al. Gut microbiome modulates response to anti-  
417 PD-1 immunotherapy in melanoma patients. *Science.* 2018;359(6371):97-103.  
418 doi:10.1126/science.aan4236
- 419 12. Dewan MZ, Galloway AE, Kawashima N, et al. Fractionated but Not Single-Dose  
420 Radiotherapy Induces an Immune-Mediated Abscopal Effect when Combined with Anti-  
421 CTLA-4 Antibody. *Clin Cancer Res.* 2009;15(17):5379-5388. doi:10.1158/1078-0432.CCR-  
422 09-0265
- 423 13. Lugade AA, Moran JP, Gerber SA, Rose RC, Frelinger JG, Lord EM. Local Radiation  
424 Therapy of B16 Melanoma Tumors Increases the Generation of Tumor Antigen-Specific  
425 Effector Cells That Traffic to the Tumor. *J Immunol.* 2005;174(12):7516-7523.  
426 doi:10.4049/jimmunol.174.12.7516
- 427 14. Lhuillier C, Rudqvist N-P, Elemento O, Formenti SC, Demaria S. Radiation therapy and  
428 anti-tumor immunity: exposing immunogenic mutations to the immune system. *Genome*  
429 *Med.* 2019;11(1):40. doi:10.1186/s13073-019-0653-7
- 430 15. Lee Y, Auh SL, Wang Y, et al. Therapeutic effects of ablative radiation on local tumor  
431 require CD8+ T cells: changing strategies for cancer treatment. *Blood.* 2009;114(3):589-595.  
432 doi:10.1182/blood-2009-02-206870

- 433 16. Ngwa W, Irabor OC, Schoenfeld JD, Hesser J, Demaria S, Formenti SC. Using  
434 immunotherapy to boost the abscopal effect. *Nat Rev Cancer*. 2018;18(5):313-322.  
435 doi:10.1038/nrc.2018.6
- 436 17. Grassberger C, Ellsworth SG, Wilks MQ, Keane FK, Loeffler JS. Assessing the interactions  
437 between radiotherapy and antitumour immunity. *Nat Rev Clin Oncol*. 2019;16(12):729-745.  
438 doi:10.1038/s41571-019-0238-9
- 439 18. Sivan A, Corrales L, Hubert N, et al. Commensal Bifidobacterium promotes antitumor  
440 immunity and facilitates anti-PD-L1 efficacy. *Science*. 2015;350(6264):1084-1089.  
441 doi:10.1126/science.aac4255
- 442 19. Hooper LV, Littman DR, Macpherson AJ. Interactions between the microbiota and the  
443 immune system. *Science*. 2012;336(6086):1268-1273. doi:10.1126/science.1223490
- 444 20. Meir H van, Nout RA, Welters MJP, et al. Impact of (chemo)radiotherapy on immune cell  
445 composition and function in cervical cancer patients. *OncoImmunology*.  
446 2017;6(2):e1267095. doi:10.1080/2162402X.2016.1267095
- 447 21. Jordanova ES, Gorter A, Ayachi O, et al. Human leukocyte antigen class I, MHC class I  
448 chain-related molecule A, and CD8+/regulatory T-cell ratio: which variable determines  
449 survival of cervical cancer patients? *Clin Cancer Res Off J Am Assoc Cancer Res*.  
450 2008;14(7):2028-2035. doi:10.1158/1078-0432.CCR-07-4554
- 451 22. Alexander JL, Wilson ID, Teare J, Marchesi JR, Nicholson JK, Kinross JM. Gut microbiota  
452 modulation of chemotherapy efficacy and toxicity. *Nat Rev Gastroenterol Hepatol*.  
453 2017;14(6):356-365. doi:10.1038/nrgastro.2017.20

- 454 23. Kohl KD, Weiss RB, Cox J, Dale C, Denise Dearing M. Gut microbes of mammalian  
455 herbivores facilitate intake of plant toxins. van Dam N, ed. *Ecol Lett*. 2014;17(10):1238-  
456 1246. doi:10.1111/ele.12329
- 457 24. Muls A, Andreyev J, Lalondrelle S, Taylor A, Norton C, Hart A. Systematic Review: The  
458 Impact of Cancer Treatment on the Gut and Vaginal Microbiome in Women With a  
459 Gynecological Malignancy. *Int J Gynecol Cancer*. 2017;27(7):1550-1559.  
460 doi:10.1097/IGC.0000000000000999
- 461 25. Gerassy-Vainberg S, Blatt A, Danin-Poleg Y, et al. Radiation induces proinflammatory  
462 dysbiosis: transmission of inflammatory susceptibility by host cytokine induction. *Gut*.  
463 2018;67(1):97-107. doi:10.1136/gutjnl-2017-313789
- 464 26. Sokol H, Adolph TE. The microbiota: an underestimated actor in radiation-induced lesions?  
465 *Gut*. 2018;67(1):1-2. doi:10.1136/gutjnl-2017-314279
- 466 27. Lavie CJ, Osman AF, Milani RV, Mehra MR. Body composition and prognosis in chronic  
467 systolic heart failure: the obesity paradox. *Am J Cardiol*. 2003;91(7):891-894.  
468 doi:10.1016/s0002-9149(03)00031-6
- 469 28. Lavie CJ, De Schutter A, Milani RV. Healthy obese versus unhealthy lean: the obesity  
470 paradox. *Nat Rev Endocrinol*. 2015;11(1):55-62. doi:10.1038/nrendo.2014.165
- 471 29. Walker JL, Piedmonte MR, Spirtos NM, et al. Laparoscopy Compared With Laparotomy for  
472 Comprehensive Surgical Staging of Uterine Cancer: Gynecologic Oncology Group Study  
473 LAP2. *J Clin Oncol*. 2009;27(32):5331-5336. doi:10.1200/JCO.2009.22.3248
- 474 30. S A-A, A S, J K. Obesity and cancer. *J Med*. 2002;33(1-4):73-86.

- 475 31. Chen H-N, Chen X-Z, Zhang W-H, et al. The Impact of Body Mass Index on the Surgical  
476 Outcomes of Patients With Gastric Cancer: A 10-Year, Single-Institution Cohort Study.  
477 *Medicine (Baltimore)*. 2015;94(42):e1769. doi:10.1097/MD.0000000000001769
- 478 32. Gunderson CC, Java J, Moore KN, Walker JL. The impact of obesity on surgical staging,  
479 complications, and survival with uterine cancer: A Gynecologic Oncology Group LAP2  
480 ancillary data study. *Gynecol Oncol*. 2014;133(1):23-27. doi:10.1016/j.ygyno.2014.01.041
- 481 33. Poorolajal J, Jenabi E. The association between BMI and cervical cancer risk: a meta-  
482 analysis. *Eur J Cancer Prev Off J Eur Cancer Prev Organ ECP*. 2016;25(3):232-238.  
483 doi:10.1097/CEJ.000000000000164
- 484 34. Chi DS, Berchuck A, Dizon DS, Yashar CM. *Principles and Practice of Gynecologic*  
485 *Oncology*. Seventh edition. Wolters Kluwer; 2017.
- 486 35. Nagaraju GP, Rajitha B, Aliya S, et al. The role of adiponectin in obesity-associated female-  
487 specific carcinogenesis. *Cytokine Growth Factor Rev*. 2016;31:37-48.  
488 doi:10.1016/j.cytogfr.2016.03.014
- 489 36. Martín-López R, Hernández-Barrera V, De Andres AL, Garrido PC, De Miguel AG, García  
490 RJ. Breast and cervical cancer screening in Spain and predictors of adherence. *Eur J Cancer*  
491 *Prev*. 2010;19(3):239–245. doi:10.1097/CEJ.0b013e3283372125
- 492 37. Lacey JV, Swanson CA, Brinton LA, et al. Obesity as a potential risk factor for  
493 adenocarcinomas and squamous cell carcinomas of the uterine cervix. *Cancer*.  
494 2003;98(4):814-821. doi:10.1002/cncr.11567

- 495 38. Brinton LA, Herrero R, Reeves WC, de Britton RC, Gaitan E, Tenorio F. Risk Factors for  
496 Cervical Cancer by Histology. *Gynecol Oncol*. 1993;51(3):301-306.  
497 doi:10.1006/gyno.1993.1294
- 498 39. Törnberg SA, Carstensen JM. Relationship between Quetelet's index and cancer of breast  
499 and female genital tract in 47,000 women followed for 25 years. *Br J Cancer*.  
500 1994;69(2):358-361. doi:10.1038/bjc.1994.65
- 501 40. Lane G. Obesity and gynaecological cancer. *Menopause Int*. 2008;14(1):33-37.  
502 doi:10.1258/mi.2007.007036
- 503 41. The Human Microbiome Project Consortium. A framework for human microbiome research.  
504 *Nature*. 2012;486(7402):215-221. doi:10.1038/nature11209
- 505 42. Edgar RC. UPARSE: highly accurate OTU sequences from microbial amplicon reads. *Nat*  
506 *Methods*. 2013;10(10):996-998. doi:10.1038/nmeth.2604
- 507 43. Dorta-Estremera S, Colbert LE, Nookala SS, et al. Kinetics of Intratumoral Immune Cell  
508 Activation During Chemoradiation for Cervical Cancer. *Int J Radiat Oncol Biol Phys*.  
509 2018;102(3):593-600. doi:10.1016/j.ijrobp.2018.06.404
- 510 44. Segata N, Izard J, Waldron L, et al. Metagenomic biomarker discovery and explanation.  
511 *Genome Biol*. 2011;12(6):R60. doi:10.1186/gb-2011-12-6-r60  
512

513 **Figures**

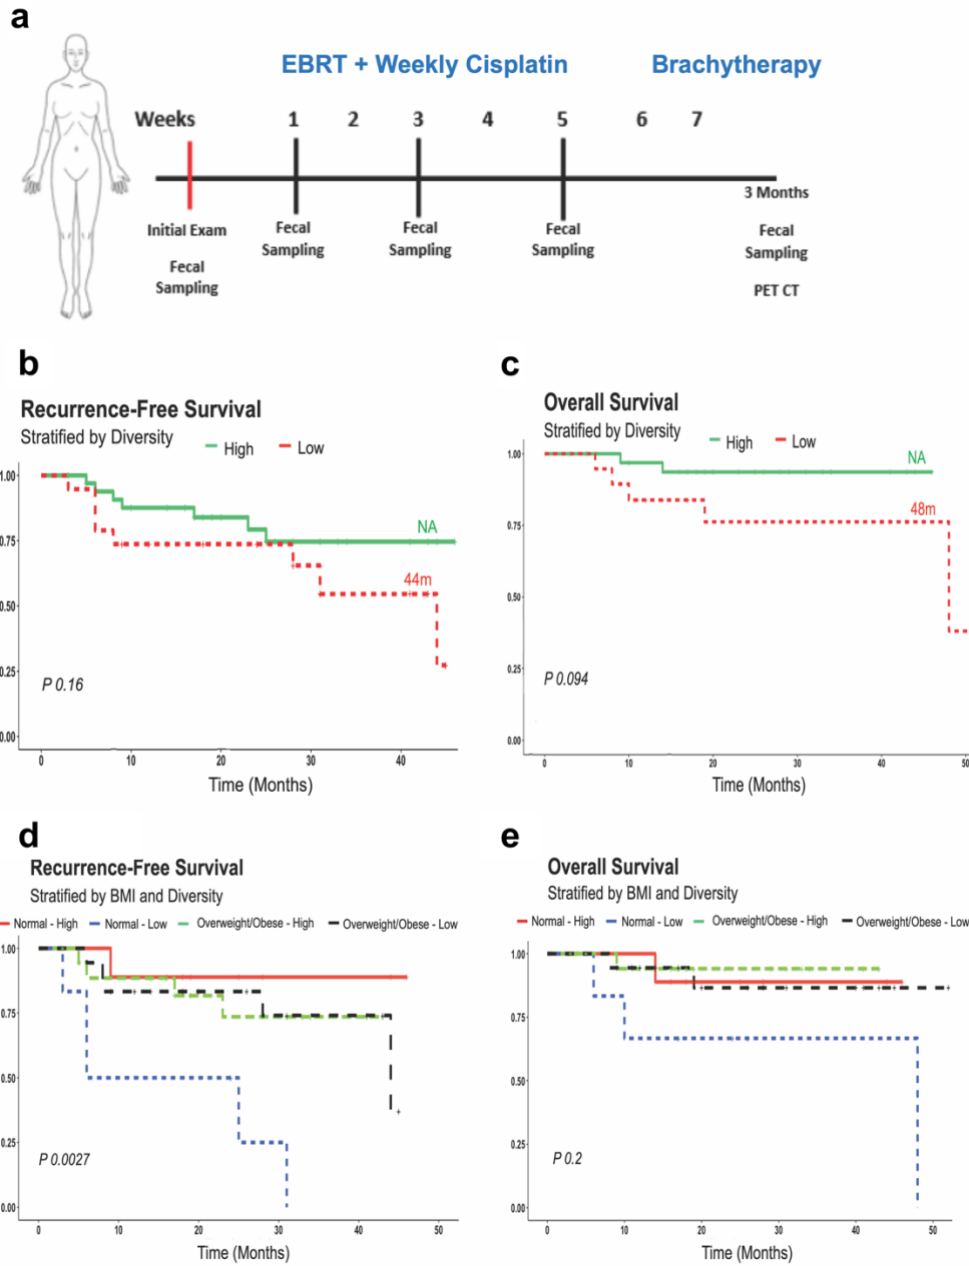

514

515 **Fig 1. Relationship between gut diversity and BMI.**

516 (A) Schema of the sample collection, treatment, and analyses used in the present study. Kaplan-  
 517 Meier curves for (B) recurrence free survival, (C) overall survival stratified by high and low gut  
 518 diversity. Kaplan-Meier curves for (D) recurrence free survival, (E) overall survival stratified by  
 519 BMI and gut diversity. Cases represent patients.



520

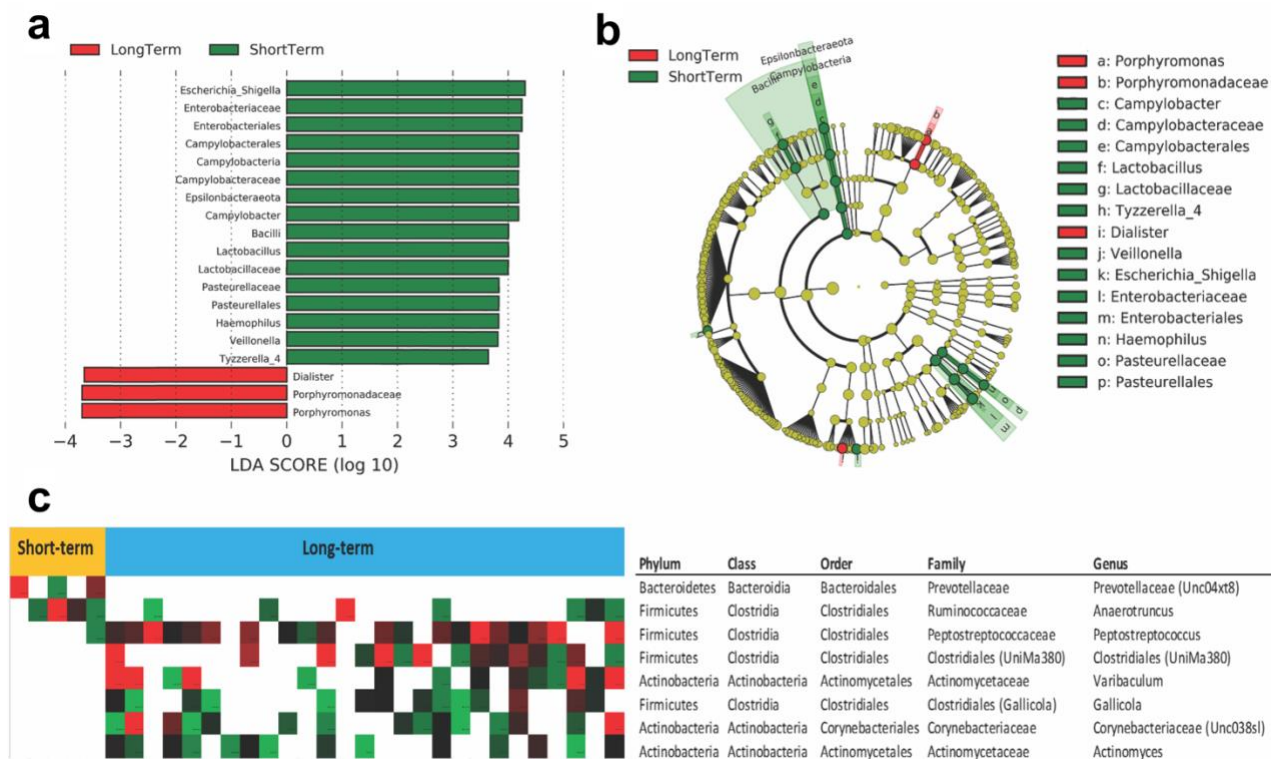

521

522 **Fig. 2. Compositional differences of the gut microbiome in short and long term survivors.**

523 (A) The different abundance of bacterial genus between the two groups were identified by

524 LEfSe. It was significantly different when alpha value of the factorial Kruskal–Wallis test was

525  $<0.05$  and the logarithmic LDA score was  $>3.0$ . The left histogram showed the LDA scores of

526 genera differentially abundant between the two groups. The taxonomy was listed, followed by its

527 core group. Putative species (Specific OTUs) identified as significantly more enriched/depleted

528 (Fisher/Wilcoxon test  $p$  value  $< 0.05$ ) in patients with short-term vs long-term in baseline

529 samples. (B) Cladogram representation of the significantly different taxa features from phylum

530 (inner circle) to genus (outer circle) (C) The right heatmap showed the relative abundance of

531 specific bacteria by phylum, class, order, family and genus between short-term and long-term

532 survivors.

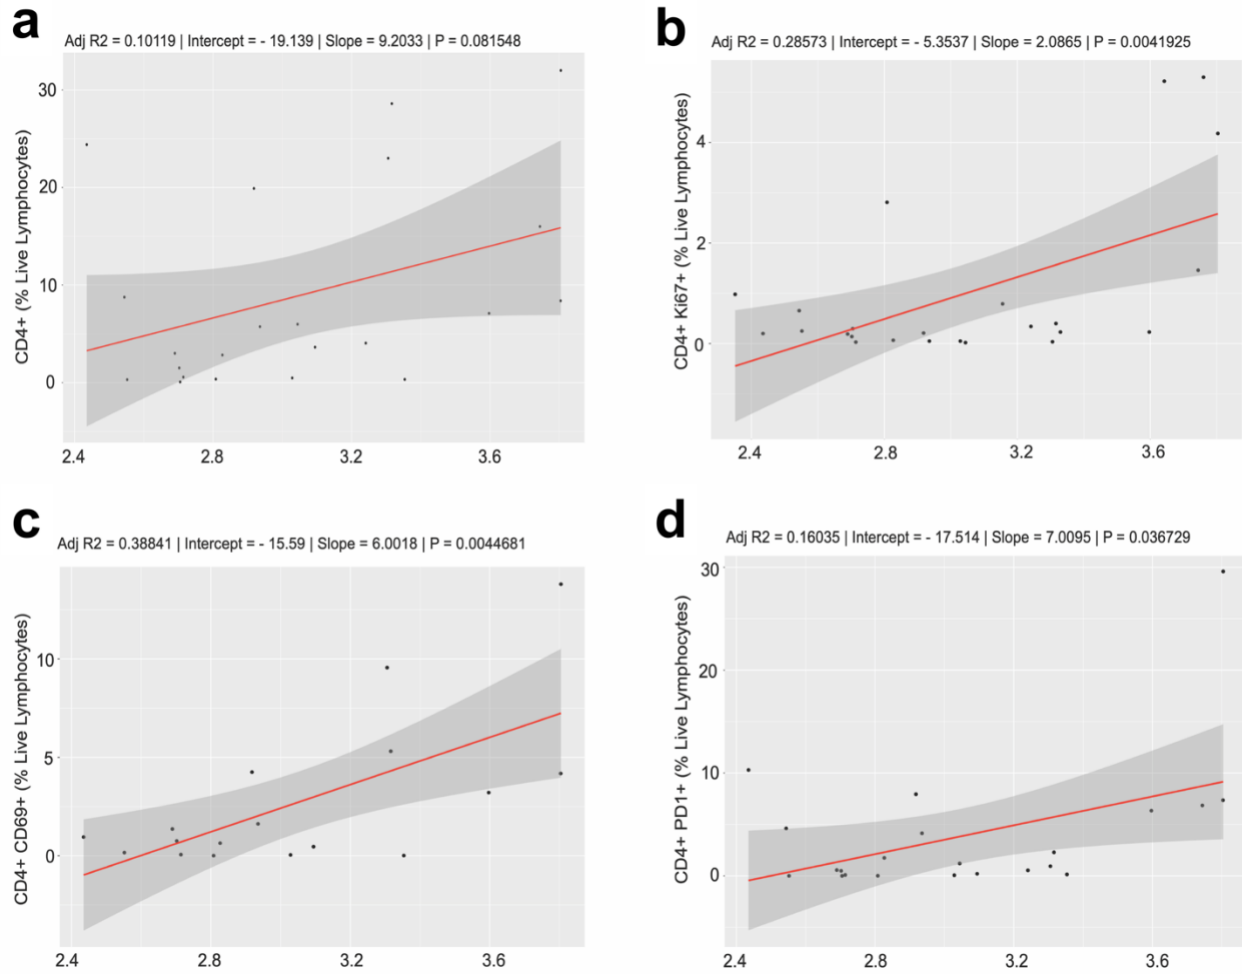

533

534 **Fig 3. Correlation analysis of Shannon Diversity Index with tumor immune signatures.**

535 (A,B,C,D) Spearman correlations between Shannon Diversity Index and CD4+, CD4+ Ki67+,

536 CD4+ CD69+, and CD4+ PD1+. Statistical analysis was performed by Spearman correlation or

537 Mann-Whitney tests.

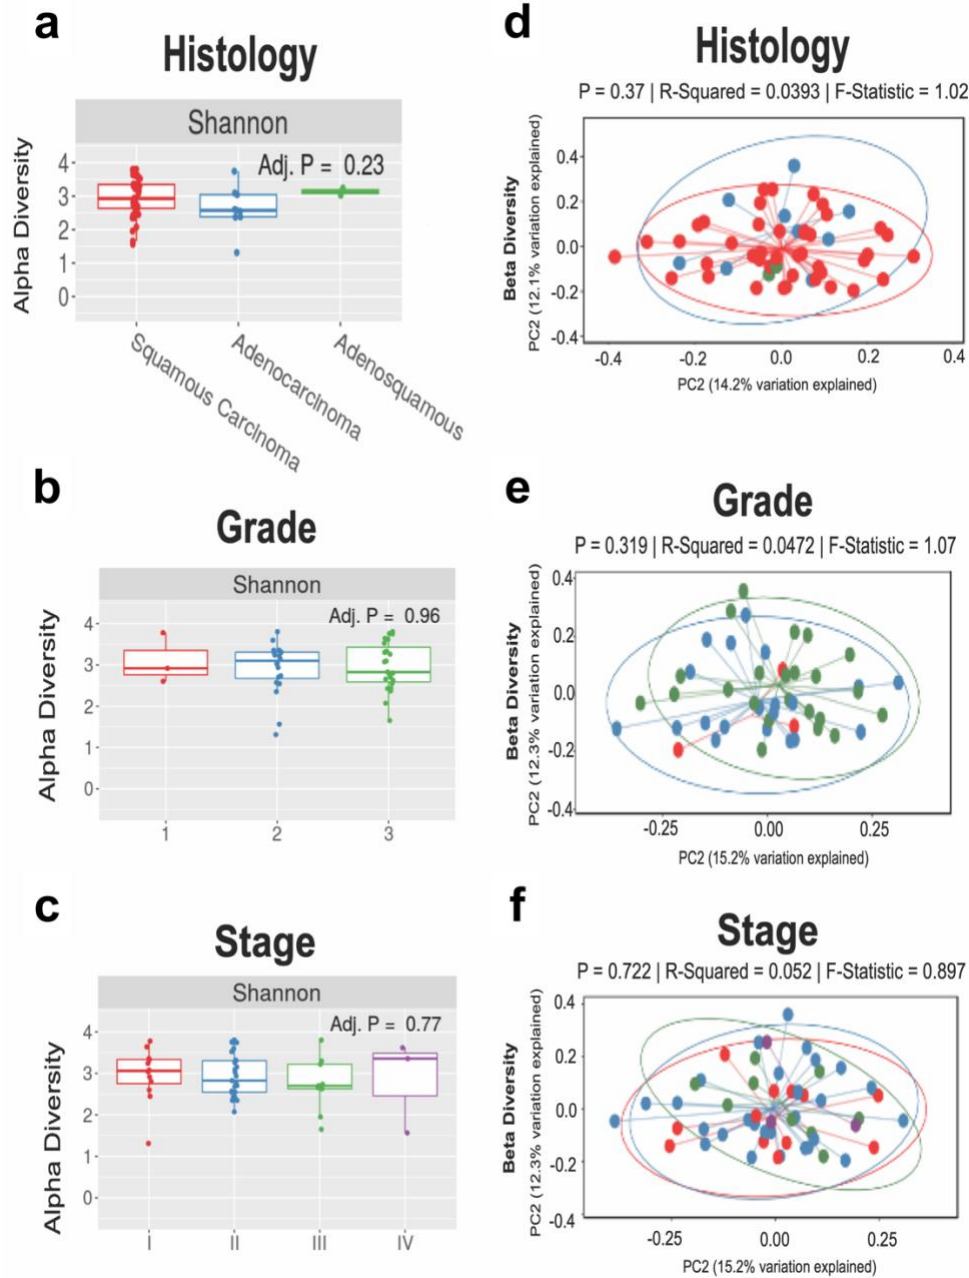

538

539 **Supplemental Fig 1. The fecal microbiota of individuals with cervical cancer.**

540 The fecal microbiota of individuals with cervical cancer by demographics. Diversity (within  
541 sample diversity) was measured using the Shannon diversity metric and Beta diversity (between  
542 sample diversity) was determined by unweighted Unifrac. No differences were observed in either  
543 metric by cancer histology (A,D), grade (B,E) or cancer stage (C,F).

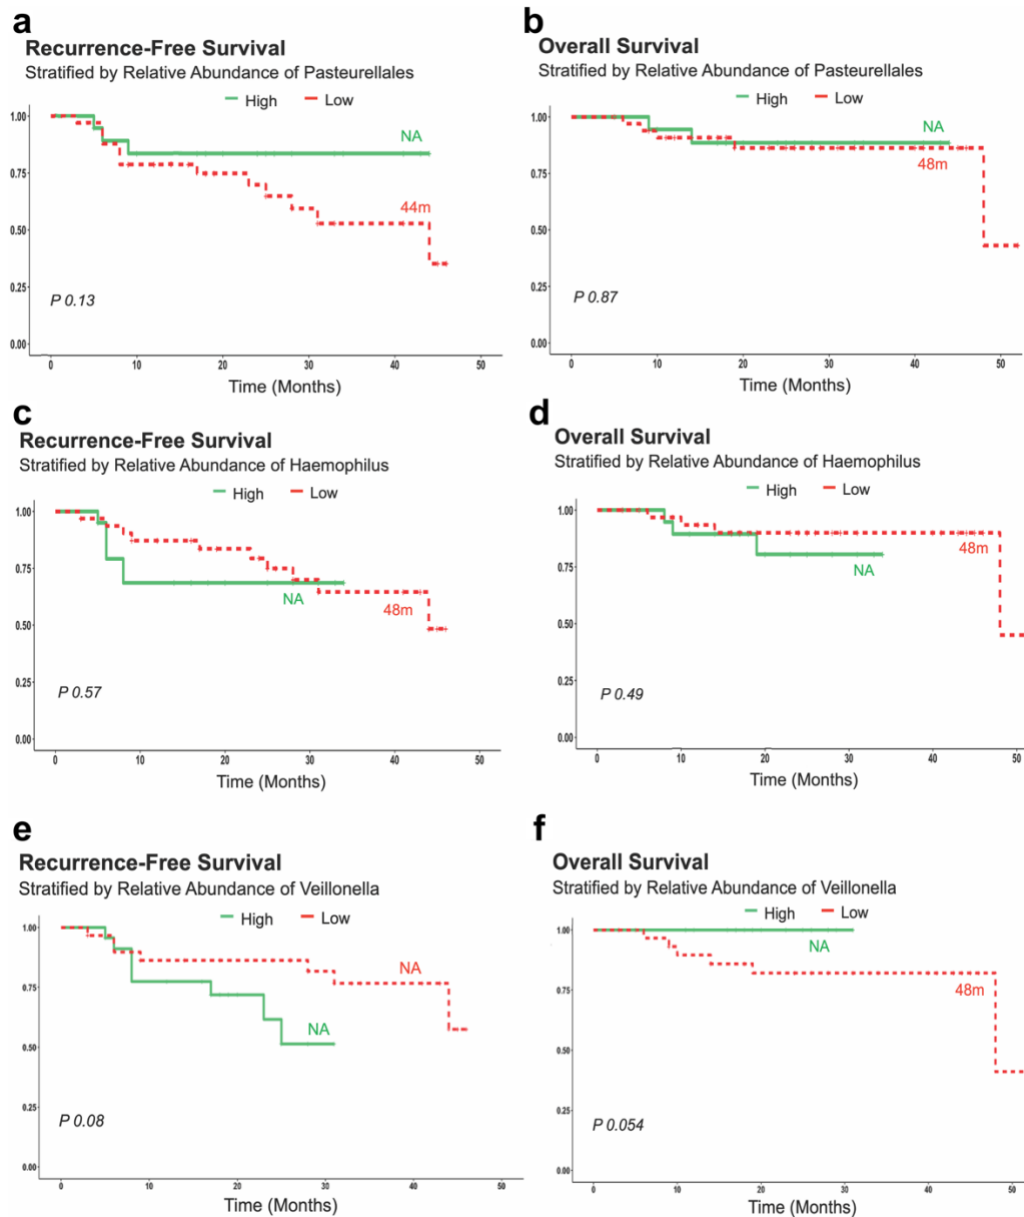

544

545 **Supplemental Fig 2. Relationship between gut diversity and BMI.**

546 Kaplan-Meier curves for (A) recurrence free survival, (B) overall survival stratified by relative  
547 abundance of *Pasteurellales*. Kaplan-Meier curves for (C) recurrence free survival, (D) overall  
548 survival stratified by relative abundance of *Haemophilus*. Kaplan-Meier curves for (E)  
549 recurrence free survival, (F) overall survival stratified by relative abundance of *Veillonella*.  
550 Cases represent patients.

551 **Table 1. Univariate and multivariate Cox regression analysis for recurrence-free survival**

| Characteristics               | Univariate model        |         | Multivariate model |         |
|-------------------------------|-------------------------|---------|--------------------|---------|
|                               | HR (95% CI)             | P value | HR (95% CI)        | P value |
| <b>Age</b>                    | 0.93 (0.87-0.98)        | 0.0096  | 0.93* (0.88-0.99)  | 0.03‡   |
| <b>BMI (kg/m<sup>2</sup>)</b> | 0.92 (0.84-1)           | 0.096   | 0.87* (0.77-0.98)  | 0.02‡   |
| Normal (18.5 to 24.9)         | 1 (reference)           |         | —                  | —       |
| Overweight (25 to 29.9)       | 0.81(0.26-2.53)         | 0.715   | —                  | —       |
| Obese (30 or more)            | 0.47(0.13-1.67)         | 0.240   | —                  | —       |
| <b>Race/Ethnicity</b>         |                         |         |                    |         |
| Asian                         | 1 (reference)           |         | —                  | —       |
| Black                         | 0.37(0.02-5.90)         | 0.479   | —                  | —       |
| Hispanic                      | 0.39 (0.05-3.21)        | 0.382   | —                  | —       |
| White                         | 0.39 (0.05-3.31)        | 0.390   | —                  | —       |
| Other                         | 4.1309E-08(-inf - +inf) | 0.998   | —                  | —       |
| <b>Stage</b>                  |                         |         |                    |         |
| I                             | 1 (reference)           |         | —                  | —       |
| II                            | 1.50 (0.31-7.34)        | 0.615   | —                  | —       |
| III                           | 3.99 (0.80-20.01)       | 0.091   | —                  | —       |
| IV                            | 2.54 (0.23-28.12)       | 0.447   | —                  | —       |
| <b>Grade</b>                  |                         |         |                    |         |
| Well                          | 1 (reference)           |         | —                  | —       |
| Moderate                      | 55297546(-inf - +inf)   | 0.998   | —                  | —       |
| Poor                          | 97336741.9(-inf - +inf) | 0.998   | —                  | —       |
| Unknown                       | 76285161.4(-inf - +inf) | 0.998   | —                  | —       |
| <b>Histology</b>              |                         |         |                    |         |
| Squamous                      | 1 (reference)           |         | —                  | —       |
| Adenocarcinoma/Adenosquamous  | 1.06(0.34-3.34)         | 0.918   | —                  | —       |
| <b>Node Level on PET</b>      |                         |         |                    |         |
| Common Iliac                  | 1 (reference)           |         | —                  | —       |
| External Iliac                | 1.33 (0.35-4.95)        | 0.675   | —                  | —       |
| Internal Iliac                | 0.67 (0.07-6.89)        | 0.736   | —                  | —       |

| Characteristics                     | Univariate model         |         | Multivariate model |         |
|-------------------------------------|--------------------------|---------|--------------------|---------|
|                                     | HR (95% CI)              | P value | HR (95% CI)        | P value |
| Para-Aortic                         | 1.31 (0.14-12.55)        | 0.818   | —                  | —       |
| None                                | 0.34 (0.06-2.09)         | 0.245   | —                  | —       |
| <b>Max Tumor Dimension on MRI</b>   | 1.3 (1-1.8)              | 0.042   | —                  | —       |
| <b>Smoking status</b>               |                          |         |                    |         |
| Current                             | 1 (reference)            |         | —                  | —       |
| Former                              | 0.91 (0.10-7.84)         | 0.934   | —                  | —       |
| Never                               | 0.89(0.11-7.17)          | 0.909   | —                  | —       |
| <b>Antibiotic Use</b>               |                          |         |                    |         |
| No                                  | 1 (reference)            |         | —                  | —       |
| Yes                                 | 78371200.7 (-inf - +inf) | 0.998   | —                  | —       |
| <b>Brachytherapy</b>                |                          |         |                    |         |
| HDR                                 | 1 (reference)            |         | —                  | —       |
| PDR                                 | 1.41 (0.48-4.149)        | 0.532   | —                  | —       |
| <b>Baseline Gut Alpha Diversity</b> |                          |         |                    |         |
| Observed OTU                        | 0.99 (0.97-1)            | 0.21    | —                  | —       |
| Shannon                             | 0.51 (0.23-1.1)          | 0.087   | 0.36* (0.15-0.84)  | 0.018‡  |
| Simpson                             | 0.025 (0.000036-1.7)     | 0.087   | —                  | —       |
| Inverse Simpson                     | 0.93 (0.84-1)            | 0.11    | —                  | —       |
| Fisher                              | 0.95 (0.88-1)            | 0.23    | —                  | —       |
| Camargo                             | 13 (0.14-1300)           | 0.27    | —                  | —       |
| Pielou                              | 0.02 (0.00026-1.6)       | 0.081   | —                  | —       |

552

553 *CI*, Confidence interval; *HR*, hazard ratio.

554 \*Significant hazard ratios.

555 ‡Significant *P* value.

556 **Table 2. Univariate and multivariate Cox regression analysis for overall survival**

| Characteristics               | Univariate model          |         | Multivariate model |         |
|-------------------------------|---------------------------|---------|--------------------|---------|
|                               | HR (95% CI)               | P value | HR (95% CI)        | P value |
| <b>Age</b>                    | 0.95 (0.87-1)             | 0.23    | —                  | —       |
| <b>BMI (kg/m<sup>2</sup>)</b> | 0.83 (0.69-1)             | 0.055   | 0.78* (0.623-0.97) | 0.025‡  |
| Normal (18.5 to 24.9)         | 1 (reference)             |         | —                  | —       |
| Overweight (25 to 29.9)       | 0.23(0.08-2.32)           | 0.323   | —                  | —       |
| Obese (30 or more)            | 0.42 (0.06-4.56)          | 0.19    | —                  | —       |
| <b>Race/Ethnicity</b>         |                           |         |                    |         |
| Asian                         | 1 (reference)             |         | —                  | —       |
| Black                         | 4.46E-09 (-inf - +inf)    | 0.999   | —                  | —       |
| Hispanic                      | 0.23(0.02-2.22)           | 0.204   | —                  | —       |
| White                         | 0.17 (0.02-1.90)          | 0.151   | —                  | —       |
| Other                         | 4.48E-09 (-inf - +inf)    | 0.999   | —                  | —       |
| <b>Stage</b>                  |                           |         |                    |         |
| I                             | 1 (reference)             |         | —                  | —       |
| II                            | 1.19 (0.12-11.43)         | 0.881   | —                  | —       |
| III                           | 1.49 (0.09-23.93)         | 0.776   | —                  | —       |
| IV                            | 5.13 (0.32-82.34)         | 0.248   | —                  | —       |
| <b>Grade</b>                  |                           |         |                    |         |
| Well                          | 1 (reference)             |         | —                  | —       |
| Moderate                      | 116103697.1 (-inf - +inf) | 0.999   | —                  | —       |
| Poor                          | 46065187.92(-inf - +inf)  | 0.999   | —                  | —       |
| Unknown                       | 149251105.9(-inf - +inf)  | 0.999   | —                  | —       |
| <b>Histology</b>              |                           |         |                    |         |
| Squamous                      | 1 (reference)             |         | —                  | —       |
| Adenocarcinoma/Adenosquamous  | 3.40 (0.69-16.90)         | 0.134   | —                  | —       |
| <b>Node Level on PET</b>      |                           |         |                    |         |
| Common Iliac                  | 1 (reference)             |         | —                  | —       |
| External Iliac                | 1.099 (0.09-12.86)        | 0.306   | —                  | —       |
| Internal Iliac                | 4.83 (0.24-98.040)        | 0.999   | —                  | —       |
| Para-Aortic                   | 5.9333E-08 (-inf - +inf)  | 0.354   | —                  | —       |

| Characteristics                     | Univariate model          |         | Multivariate model |         |
|-------------------------------------|---------------------------|---------|--------------------|---------|
|                                     | HR (95% CI)               | P value | HR (95% CI)        | P value |
| None                                | 3.34(0.26-42.69)          | 0.940   | —                  | —       |
| <b>Max Tumor Dimension on MRI</b>   | 1.2 (0.77-1.8)            | 1.2     | —                  | —       |
| <b>Smoking status</b>               |                           |         |                    |         |
| Current                             | 1 (reference)             |         | —                  | —       |
| Former                              | 106318829.2 (-inf - +inf) | 0.999   | —                  | —       |
| Never                               | 61091037.65 (-inf - +inf) | 0.999   | —                  | —       |
| <b>Antibiotic Use</b>               |                           |         |                    |         |
| No                                  | 1 (reference)             |         | —                  | —       |
| Yes                                 | 0.53 (0.06-4.56)          | 0.564   | —                  | —       |
| <b>Brachytherapy</b>                |                           |         |                    |         |
| HDR                                 | 1 (reference)             |         | —                  | —       |
| PDR                                 | 0.89 (-1.61-1.39)         | 0.884   | —                  | —       |
| <b>Baseline Gut Alpha Diversity</b> |                           |         |                    |         |
| Observed OTU                        | 0.98 (0.95-1)             | 0.14    | —                  | —       |
| Shannon                             | 0.34 (0.1-1.1)            | 0.08    | 0.19* (0.043-0.83) | 0.028‡  |
| Simpson                             | 0.0059 (1.2e-05-2.9)      | 0.1     | —                  | —       |
| Inverse Simpson                     | 0.85 (0.7-1)              | 0.13    | —                  | —       |
| Fisher                              | 0.91 (0.79-1)             | 0.15    | —                  | —       |
| Camargo                             | 2200 (0.84-5800000)       | 0.055   | —                  | —       |
| Pielou                              | 0.0036 (5e-06-2.5)        | 0.093   | —                  | —       |

557

558 *CI*, Confidence interval; *HR*, hazard ratio.

559 \*Significant hazard ratios.

560 ‡Significant *P* value.



561 **Table 3. Correlation of baseline gut diversity (Inverse Shannon Diversity) with phenotype of tumor**  
562 **infiltrating lymphocytes during chemoradiation treatment. The percent of live lymphocytes**  
563 **expressing each marker was correlated with baseline Shannon diversity of the gut microbiome.**

|                  | P-value* | Q value | R <sub>2</sub> |
|------------------|----------|---------|----------------|
| CD4+Ki.67+ at T4 | 0.004‡   | 0.0714  |                |
| CD4+CD69+ at T3  | 0.004‡   | 0.1429  |                |
| CD4+PD1+ at T3   | 0.0367‡  | 0.2143  |                |
| CD4+CTLA4+ at T3 | 0.057    | 0.2857  |                |
| CD4+             |          |         | 0.1            |

564 \*P-value correlation of immune metric with baseline gut diversity

565 ‡Significant *P* value.

566 **Supplemental Table 1. Patient and tumor characteristics (N=55)**  
 567

|                                         | N          | (%)    |
|-----------------------------------------|------------|--------|
| <b>Median age, yrs (range)</b>          | 48 (28-72) | —      |
| <b>BMI, Mean (SD), kg/m<sup>2</sup></b> | 28.7(6.06) | —      |
| <b>Race/Ethnicity</b>                   |            |        |
| Asian                                   | 2          | (36.4) |
| Black                                   | 4          | (18.2) |
| Hispanic                                | 24         | (43.6) |
| White                                   | 24         | (43.6) |
| Other                                   | 1          | (1.8)  |
| <b>FIGO Stage</b>                       |            |        |
| IA1                                     | 1          | (1.8)  |
| IA2                                     | 0          | (0)    |
| IB1                                     | 5          | (9.09) |
| IB2                                     | 6          | (10.9) |
| IIA                                     | 3          | (5.45) |
| IIB                                     | 28         | (50.9) |
| IIIA                                    | 9          | (16.3) |
| IIIB                                    | 0          | (0)    |
| IVA                                     | 3          | (5.45) |
| IVB                                     | 0          | (0)    |
| <b>Grade</b>                            |            |        |
| Well                                    | 4          | (7.2)  |
| Moderate                                | 20         | (36.3) |
| Poor                                    | 25         | (45.4) |
| Unknown                                 | 6          | (10.9) |
| <b>Histology</b>                        |            |        |
| Squamous                                | 43         | (78.1) |
| Adenocarcinoma                          | 8          | (18.1) |
| Adenosquamous                           | 3          | (3.63) |
| <b>Node Level on PET</b>                |            |        |
| Common Iliac                            | 9          | (16.3) |

|                                         |     |        |
|-----------------------------------------|-----|--------|
| External Iliac                          | 23  | (41.8) |
| Internal Iliac                          | 5   | (9.09) |
| Para-Aortic                             | 3   | (5.45) |
| None                                    | 15  | (27.2) |
| <b>Median cervical tumor size (cm)</b>  | 5.4 | —      |
| <b>Smoking status</b>                   |     |        |
| Current                                 | 4   | (7.27) |
| Former                                  | 20  | (36.3) |
| Never                                   | 31  | (56.3) |
| <b>Antibiotic Use</b>                   |     |        |
| No                                      | 5   | (9.1)  |
| Yes                                     | 50  | (90.9) |
| <b>Brachytherapy</b>                    |     |        |
| HDR                                     | 21  | (38.2) |
| PDR                                     | 34  | (61.8) |
| <b>Concurrent Chemotherapy (cycles)</b> |     |        |
| <i>Cisplatin</i>                        |     |        |
| (1-3)                                   | 2   | (3.6)  |
| (≥4)                                    | 51  | (92.7) |
| <i>Carboplatin</i>                      |     |        |
| (2)                                     | 1   | (1.8)  |
| <i>Carboplatin + Cisplatin</i>          |     |        |
| (2)+(2)                                 | 1   | (1.8)  |

568 FIGO- International Federation of Gynecology and Obstetrics

569 HDR-High Dose Rate

570 PDR- Pulsed Dose Rate

571 **Supplemental Table 2. Univariate Cox regression analysis for recurrence-free survival – Alpha Diversity all**  
 572 **time points**

573

| <b>Characteristics</b> | <b>Univariate model</b>  |                |
|------------------------|--------------------------|----------------|
|                        | <b>HR (95% CI)</b>       | <b>P value</b> |
| <b>Observed OTU</b>    |                          |                |
| Baseline               | 0.99 (0.97-1)            | 0.21           |
| Week 1                 | 1 (0.97-1)               | 0.69           |
| Week 3                 | 0.99 (0.96-1)            | 0.59           |
| Week 5                 | 1 (0.98-1)               | 0.71           |
| Week 12                | 1 (0.98-1)               | 0.77           |
| <b>Shannon</b>         |                          |                |
| Baseline               | 0.51 (0.23-1.1)          | 0.087          |
| Week 1                 | 0.94 (0.2-4.4)           | 0.94           |
| Week 3                 | 1.2 (0.25-5.6)           | 0.83           |
| Week 5                 | 0.83 (0.35-1.9)          | 0.66           |
| Week 12                | 2.7 (0.13-57)            | 0.51           |
| <b>Simpson</b>         |                          |                |
| Baseline               | 0.025 (0.00036-1.7)      | 0.087          |
| Week 1                 | 13 (1.4e-05-1.2e+07)     | 0.13           |
| Week 3                 | 52 (6.6e-05-4.1e+07)     | 0.57           |
| Week 5                 | 0.31 (0.013-7.8)         | 0.48           |
| Week 12                | 130000 (7.5e-13-2.2e+22) | 0.56           |

| Characteristics        | Univariate model |         |
|------------------------|------------------|---------|
|                        | HR (95% CI)      | P value |
| <b>Inverse Simpson</b> |                  |         |
| Baseline               | 0.93 (0.84-1)    | 0.11    |
| Week 1                 | 0.96 (0.79-1.2)  | 0.69    |
| Week 3                 | 1 (0.95-1.1)     | 0.34    |
| Week 5                 | 1 (0.92-1.2)     | 0.54    |
| Week 12                | 1.1 (0.81-1.4)   | 0.59    |
| <b>Fisher</b>          |                  |         |
| Baseline               | 0.95 (0.88-1)    | 0.23    |
| Week 1                 | 0.97 (0.86-1.1)  | 0.66    |
| Week 3                 | 0.96 (0.83-1.1)  | 0.6     |
| Week 5                 | 1 (0.91-1.2)     | 0.69    |
| Week 12                | 1 (0.89-1.2)     | 0.81    |

574 *CI*, Confidence interval; *HR*, hazard ratio.

575 \*Significant hazard ratios.

576 ‡Significant *P* value.

577 **Supplemental Table 3. Univariate Cox regression analysis for overall survival – Alpha Diversity all time**  
 578 **points**

579

| <b>Characteristics</b> | <b>Univariate model</b> |                |
|------------------------|-------------------------|----------------|
|                        | <b>HR (95% CI)</b>      | <b>P value</b> |
| <b>Observed OTU</b>    |                         |                |
| Baseline               | 0.98 (0.95-1)           | 0.14           |
| Week 1                 | 0.98 (0.94-1)           | 0.35           |
| Week 3                 | 0.97 (0.92-1)           | 0.21           |
| Week 5                 | 1 (0.96-1)              | 0.98           |
| Week 12                | NA (NA-NA)              | 1              |
| <b>Shannon</b>         |                         |                |
| Baseline               | 0.34 (0.1-1.1)          | 0.08           |
| Week 1                 | 0.48 (0.063-3.7)        | 0.48           |
| Week 3                 | 1.2 (0.25-5.6)          | 0.83           |
| Week 5                 | 0.23 (0.037-1.4)        | 0.11           |
| Week 12                | NA (NA-NA)              | 1              |
| <b>Simpson</b>         |                         |                |
| Baseline               | 0.0059 (1.2e-05-2.9)    | 0.1            |
| Week 1                 | 0.45 (1.1e-08-1.8e+07)  | 0.93           |
| Week 3                 | 0.009 (1.7e-07-490)     | 0.4            |
| Week 5                 | 1.4 (0.00063-3200)      | 0.93           |
| Week 12                | NA (NA-NA)              | 1              |

| Characteristics        | Univariate model |         |
|------------------------|------------------|---------|
|                        | HR (95% CI)      | P value |
| <b>Inverse Simpson</b> |                  |         |
| Baseline               | 0.85 (0.7-1)     | 0.13    |
| Week 1                 | 0.86 (0.62-1.2)  | 0.39    |
| Week 3                 | 0.81 (0.61-1.1)  | 0.15    |
| Week 5                 | 0.89 (0.66-1.2)  | 0.46    |
| Week 12                | NA (NA-NA)       | 1       |
| <b>Fisher</b>          |                  |         |
| Baseline               | 0.91 (0.79-1)    | 0.15    |
| Week 1                 | 0.91 (0.74-1.1)  | 0.34    |
| Week 3                 | 0.84 (0.64-1.1)  | 0.22    |
| Week 5                 | 0.99 (0.79-1.3)  | 0.94    |
| Week 12                | NA (NA-NA)       | 1       |

580 *CI*, Confidence interval; *HR*, hazard ratio.

581 \*Significant hazard ratios.

582 ‡Significant *P* value.
